# Supplementary material for: A nucleic acid dye-enhanced electrochemical biosensor for the label-free detection of Hg2+ based on a gold nanoparticle-modified disposable screen-printed electrode
Source: Royal Society of Chemistry journal article supplement (doi:10.1039/d2ay00548d), 2022-01-01
Supplement: d2ay00548d1.pdf [file d2ay00548d1.pdf]

1  
2  
3  
4  
5  
6  
7  
8  
9  
10  
11  
12  
13  
14  
15  
16

## Supporting information

### **A nucleic acid dye-enhanced electrochemical biosensor for the label-free detection of Hg<sup>2+</sup> based on gold nanoparticle modified disposable screen-printed electrode**

Wei Liu,<sup>a</sup> Yunqi Wang,<sup>a</sup> Fangfang Sheng,<sup>a</sup> Bing Wan,<sup>a</sup> Gangxu Tang,<sup>b</sup> Shuxia Xu<sup>a c\*</sup>

*a College of Environment and Ecology, Chengdu University of Technology, Chengdu*

*610059, P. R. China*

*b College of Material and Chemistry & Chemical Engineering, Chengdu University of*

*Technology, Chengdu 610059, P. R. China*

*c State Environmental Protection Key Laboratory of Synergetic Control and Joint*

*Remediation for Soil & Water Pollution, Chengdu University of Technology, Chengdu*

*610059, P. R. China*

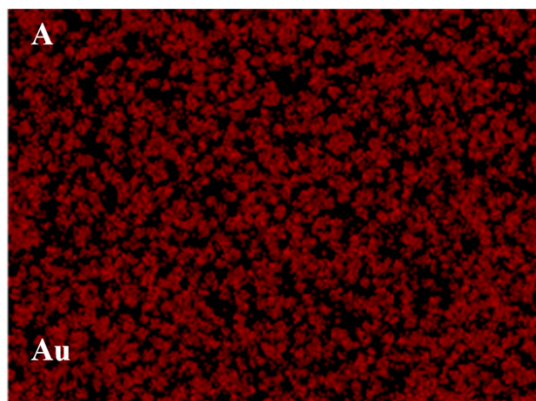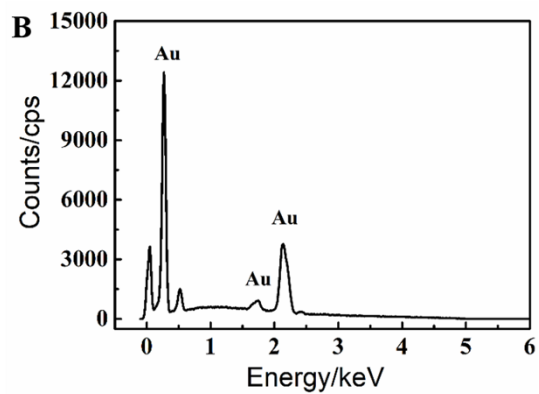

17

18

19 **Fig S1** (A) The elemental mapping images of the AuNPs modified SPCE surface. (B) EDS

20 pattern of the AuNPs modified SPCE surface.

21

22 Table S1 Variation of CV and EIS values of electrode surface under different modification

23 steps.

| Steps                                              | CV<br>( $\mu\text{A}$ ) | EIS<br>( $\Omega$ ) |
|----------------------------------------------------|-------------------------|---------------------|
| AuNPs/ SPCE                                        | 63.24                   | 339.6               |
| DNA-c/ AuNPs/ SPCE                                 | 42.74                   | 895.9               |
| MCH/ DNA-c/ AuNPs/ SPCE                            | 33.53                   | 2472                |
| Hg <sup>2+</sup> / MCH/ DNA-c/ AuNPs/ SPCE         | 35.60                   | 2015                |
| GelRed/ Hg <sup>2+</sup> / MCH/ DNA-c/ AuNPs/ SPCE | 57.25                   | 610.2               |

24

25

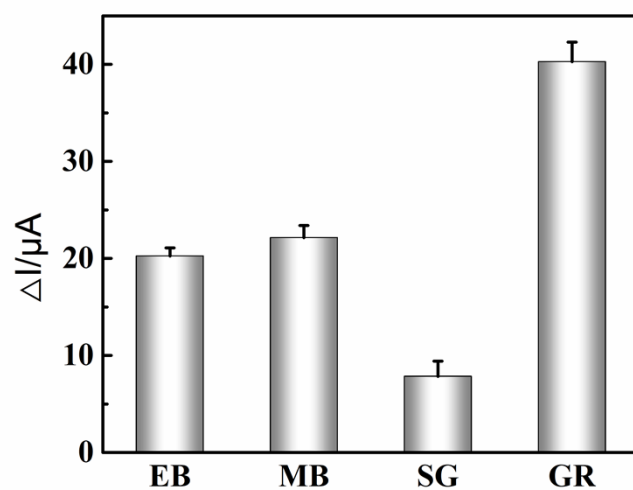

26

27

28 **Fig S2** DPV signal responses of the electrochemical sensor with different dyes, EB

29 (ethidium bromide), 2 $\mu$ M; MB (methylene blue), 2  $\mu$ M; SG (SYBR Green I), 2 $\times$ ; GelRed,

30 2 $\times$ . Error bars represented the standard deviation of three parallel experiments.

31

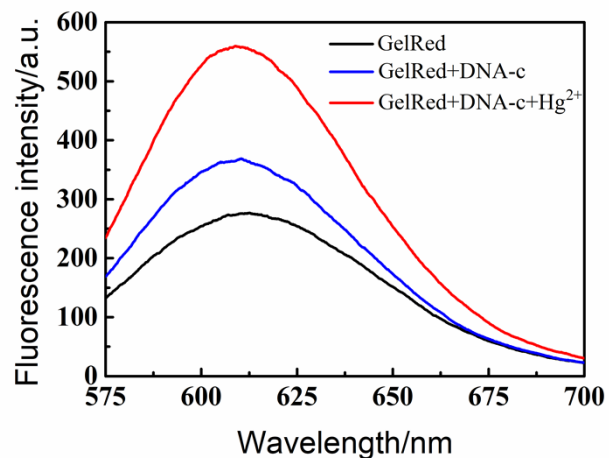

32

33

34 **Fig S3** Fluorescence spectra of GelRed, GelRed+DNA-c and GelRed + DNA-c + Hg<sup>2+</sup>.

35 (Concentration of Hg<sup>2+</sup> =500 nM, DNA-c=100 nM, GelRed=2×, excitation wavelength was

36 530 nm)

37

38

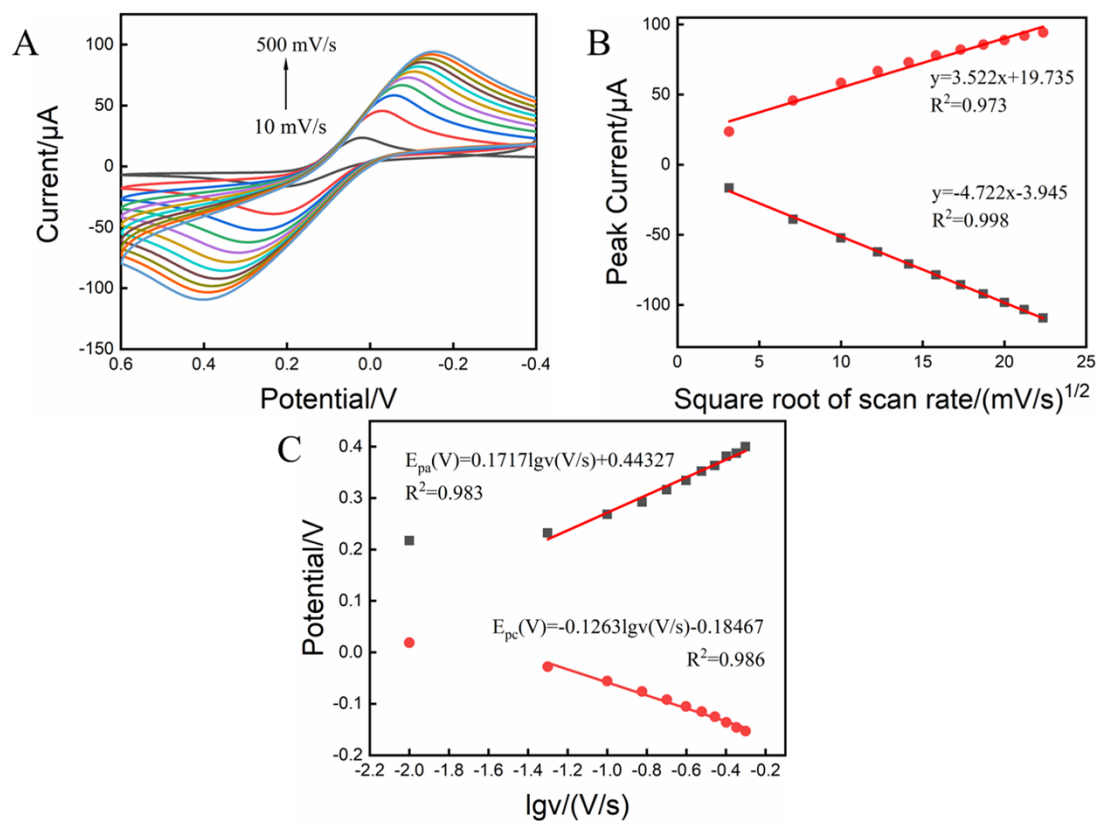

39

40

41 **Fig S4** (A) CVs of electrochemical sensors at different scan rates; (B) the linear relationship

42 between peak current and the square root of scanning speed; (C) the linear relationship

43 between the anodic and cathodic peak potentials versus logarithm of scan rate.

44

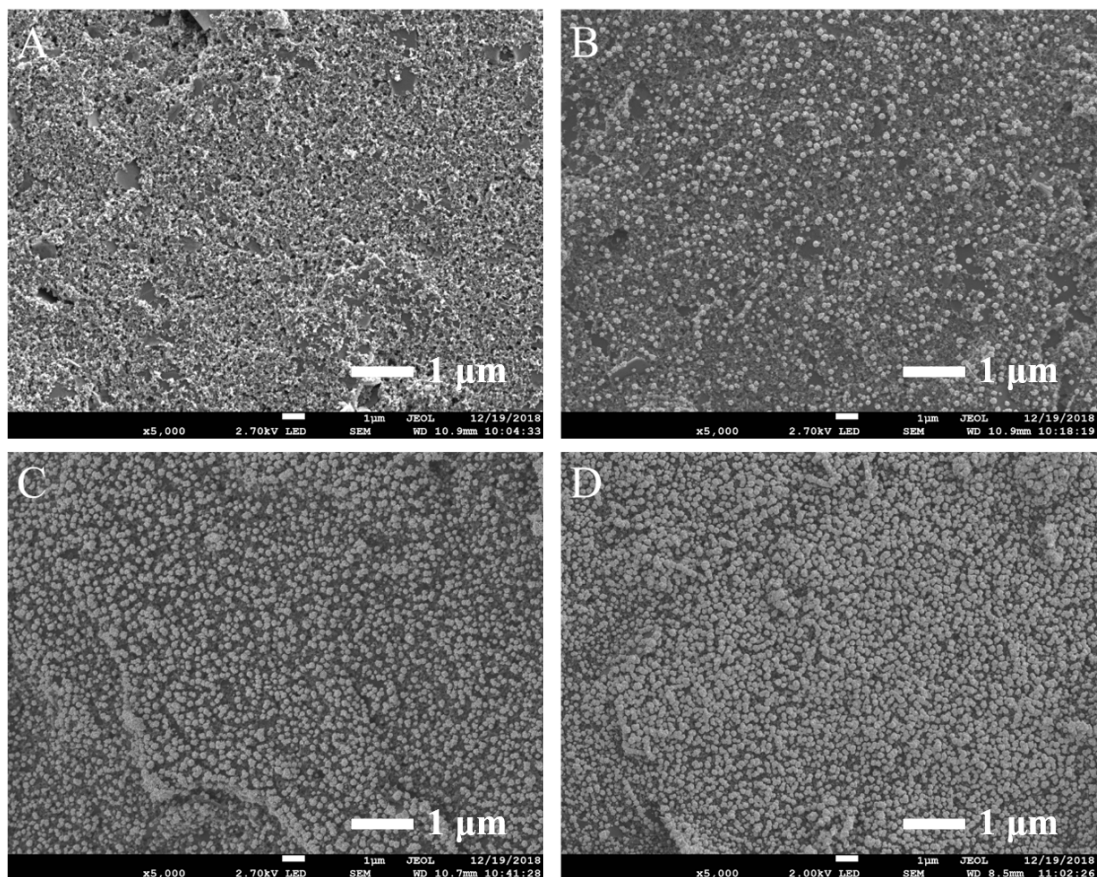

45

46

47 **Fig S5** The SEM images of the electrode surfaces with different electrodeposition times,

48 (A) unmodified SPCE;(B)50 s; (C) 150 s; (D) 300 s.

49

50

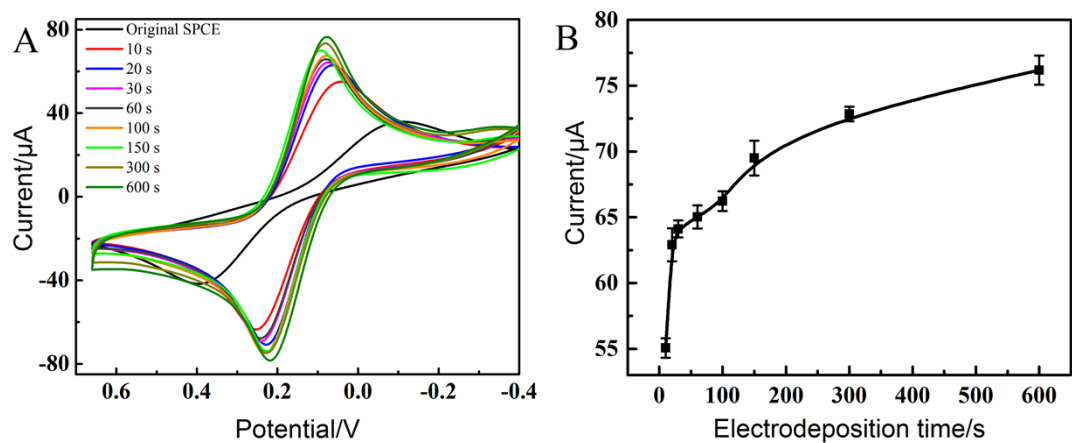

51

52

53 **Fig S6** The (A) CVs and (B) electrochemical response of electrodes in  $[\text{Fe}(\text{CN})_6]^{3-/4-}$   
54 (evaluated through the DPVs) with different electrodeposition times. Error bars represented  
55 the standard deviation of three parallel experiments.

56



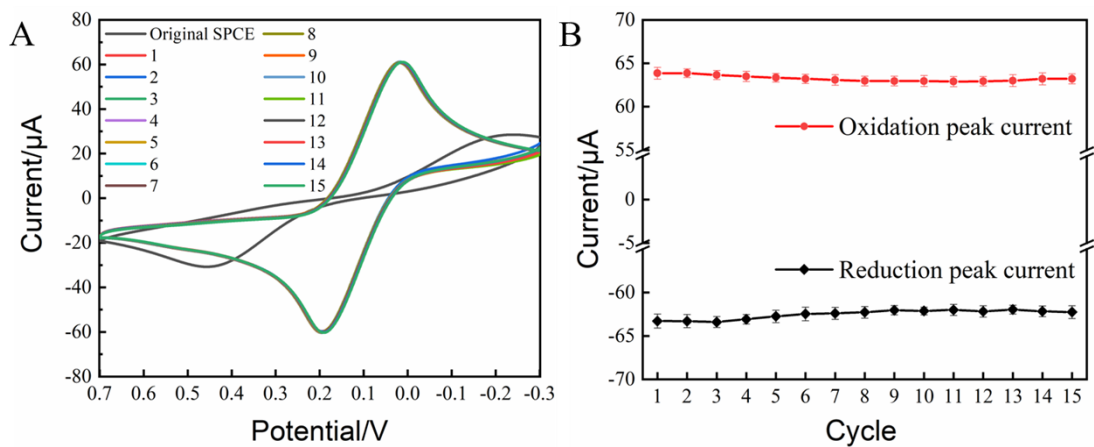

57

58

59 **Fig S7** (A) CVs and (B) redox peak current of the AuNPs modified SPCE after successive

60 fifteen cycles.

61

62

63 **Table S2** Comparison of different Hg<sup>2+</sup>detection methods

| <b>Method</b>    | <b>Linier range</b> | <b>Limit of detection</b> | <b>Ref.</b> |
|------------------|---------------------|---------------------------|-------------|
| fluorescence     | 5–250 nM            | 1.95 nM                   | 1           |
| fluorescence     | 0.1-50 μM           | 19.0 nM                   | 2           |
| fluorescence     | 50- 1200 nM         | 20.0 nM                   | 3           |
| colorimetry      | 2-100 nM            | 14.23 nM                  | 4           |
| colorimetriy     | 2-28 nM             | 0.032 nM                  | 5           |
| SERS             | 0.1-1000 nM         | 0.1 nM                    | 6           |
| SERS             | 0.1-10000 nM        | 0.1 nM                    | 7           |
| Electrochemistry | 0.1- 10 nM          | 0.028 nM                  | 8           |
| Electrochemistry | 0.1-130 nM          | 0.03 nM                   | 9           |
| Electrochemitry  | 0.05-100 nM         | 0.024 nM                  | 10          |
| Electrochemitry  | 0.1-500 nM          | 0.04 nM                   | This work   |

64

## References

65

66 1 J. Wang, F. Song, Y. Ai, S. Hu, Z. Huang and W. Zhong, *J. Lumin.*, 2019, **34**, 205-211.

67 2 S. Liao, X. Li, H. Yang and X. Chen, *Talanta*, 2019, **194**, 554-562.

68 3 P. E. Hande, A. B. Samui and P. S. Kulkarni, *Actuators B Chem.*, 2017, **246**, 597-605.

69 4 P. Borthakur, G. Darabdhara, M. R. Das, R. Boukherroub and S. Szunerits, *Sens. Actuators B*

70 *Chem.*, 2017, **244**, 684-692.

71 5 J. Hai, F. Chen, J. Su, F. Xu and B. Wang, *Anal. Chem.*, 2018, **90**, 4909-4915.

72 6 L. Qi, M. Xiao, F. Wang, L. Wang, W. Ji, T. Man, A. Aldalbahi, M. Naziruddin Khan, G.

73 Periyasami, M. Rahaman, A. Alrohaili, X. Qu, H. Pei, C. Wang and L Li, *Nanoscale*, 2017, **9**,

74 14184-14191.

75 7 Q. Zou, X. Li, T. Xue, J. Zheng and Q. Su, *Talanta*, 2019, **195**, 497-505.

76 8 A. L. Suherman, K. Ngamchuea, E. E. L. Tanner, S. V. Sokolov, J. Holter, N. P. Young and R. G.

77 Compton RG, *Anal. Chem.*, 2017, **89**, 7166-7173.

78 9 H. Wang, Y. Zhang, H. Ma, X. Ren, Y. Wang, Y. Zhang and Q. Wei, *Biosens. Bioelectron.*, 2016,

79 **86**, 907-912.

80 10 C. Mei, D. Lin, C. Fan, A. Liu, S. Wang and J. Wang, *Biosens. Bioelectron.*, 2016, **80**, 105-110.

81

82
